# Supplementary material for: Porous Zirconia Blocks for Bone Repair: An Integrative Review on Biological and Mechanical Outcomes
Source: MDPI journal article supplement (doi:10.3390/ceramics5010014), 2022-03-17
Supplement: s1 [file s1]

Archive with 1 entries (1 files):
- ceramics-1577150-supplementary.pdf
